# Supplementary material for: High-Carbohydrate Diets and Food Patterns and Their Associations with Metabolic Disease in the Korean Population
Source: PubMed Central journal article supplement — Yonsei Med J. 2018 Aug 7;59(7):834–42. doi: 10.3349/ymj.2018.59.7.834 (PMC6082982; doi:10.3349/ymj.2018.59.7.834), 2018-08-07
Supplement: ymj-59-834-s002.pdf [file ymj-59-834-s002.pdf]

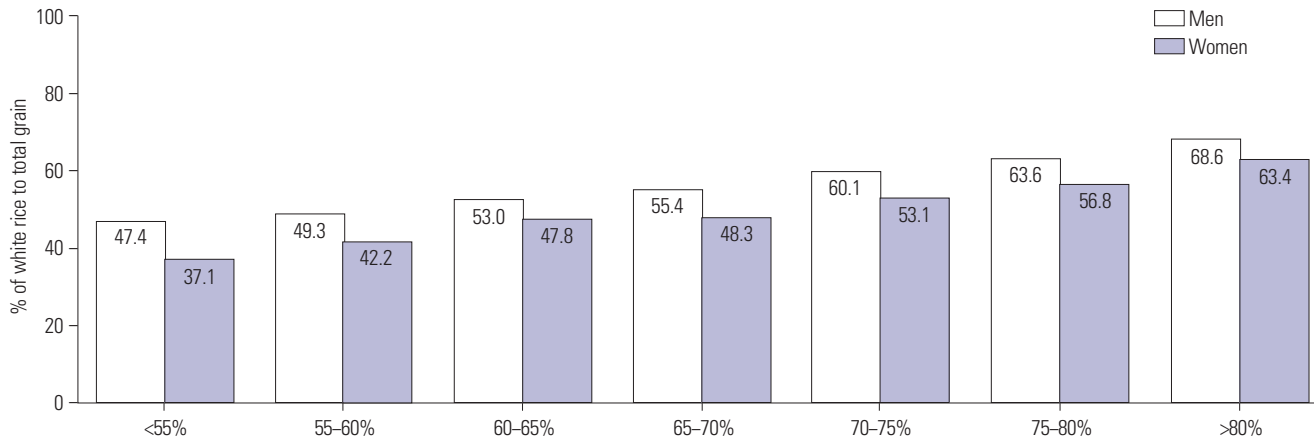

**Supplementary Fig. 2.** Contribution of white rice to total grain intake according to dietary carbohydrate intake by sex.
