# Supplementary figures and images for: High-Carbohydrate Diets and Food Patterns and Their Associations with Metabolic Disease in the Korean Population
Source: PubMed Central journal article supplement — Yonsei Med J. 2018 Aug 7;59(7):834–42. doi: 10.3349/ymj.2018.59.7.834 (PMC6082982; doi:10.3349/ymj.2018.59.7.834), 2018-08-07

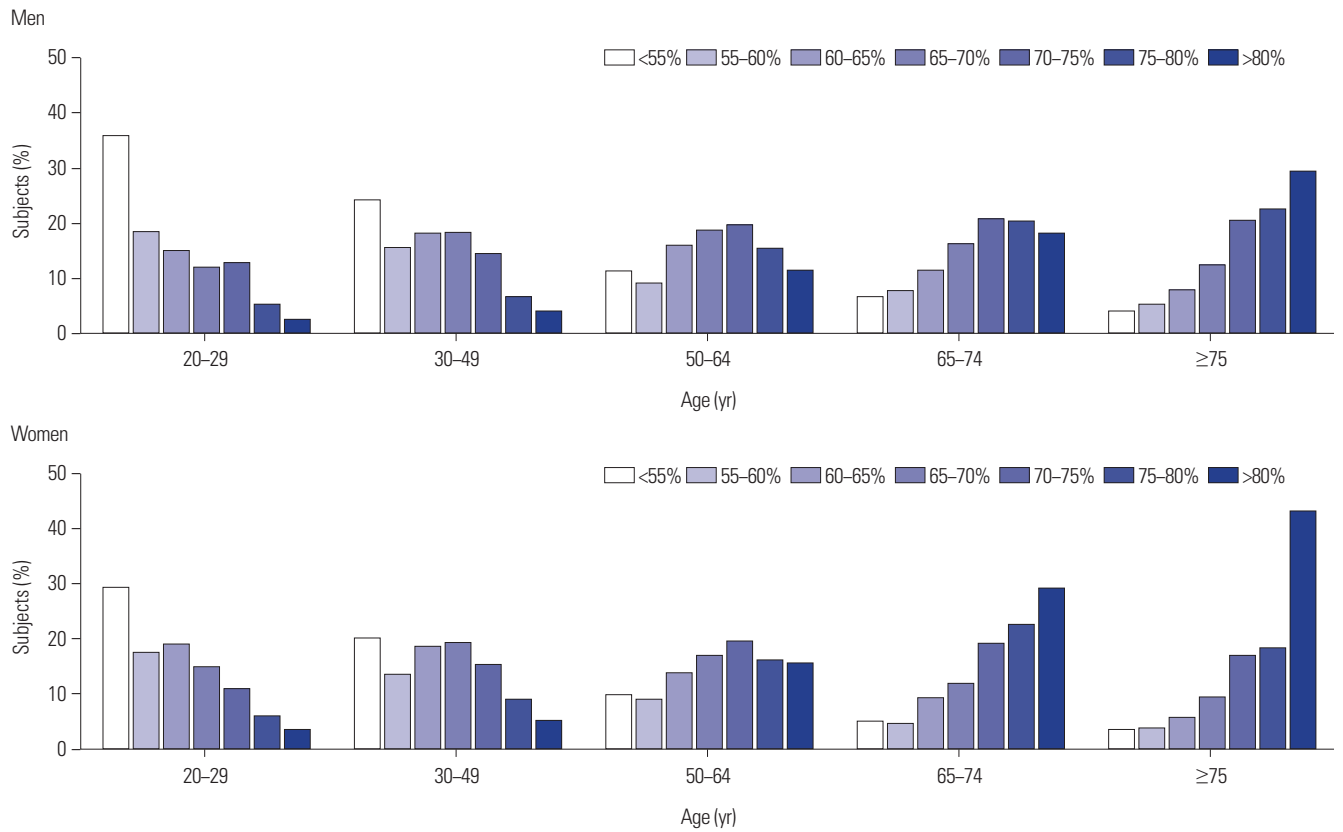

**Supplementary Fig. 1.** Distribution of dietary carbohydrate intake according to age group by sex.

Supplement: ymj-59-834-s001.pdf [file ymj-59-834-s001.pdf]
